# Supplementary material
Source: PubMed Central journal article supplement (PMC3904788)

## Figure Legends

- Figure 1. Graph of mean DMB concentration vs. time plots under fasted and fed conditions at the 20 mg/kg dose level in the single dose study.
- Figure 2. Mean DMB plasma concentration vs. time plots by treatment group at Day 13, in the multiple-dose study.
- Figure 3. Changes in mean absolute reticulocytes assayed by Advia Coulter Counter from baseline (white bars) and peak on treatment (dark bars) are shown in placebo and active treatment groups. Standard deviations are shown by the vertical lines. Differences between baseline and peak values were significant in the treatment groups shown, ( $p < 0.05$ ), but not in the placebo group ( $p = 0.19$ ). Results are shown for the 5 mg/kg dose in the fasting cohort; the other doses were administered after food. Significant changes are noted with an asterix above the bar.

### Supplemental Figure 1.

Mean AUC vs. DMB dose, on Day 0 (1a) and on Day 13 (1b).

### Supplemental Figure 2.

Mean DMB maximal concentration vs. dose on Day 0 (upper panel, 2a) and Day 13 (lower panel, 2b) in the multi-dose study.

**Supplemental Figure 1a: AUC versus Dose – Day 0 (Repeat-Dose Study)**

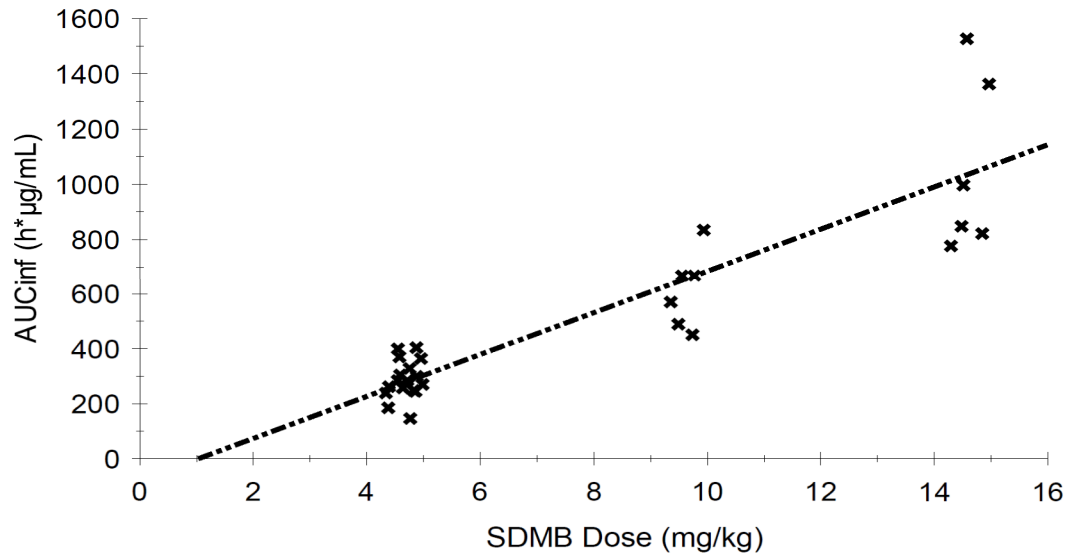

**Supplemental Figure 1b: AUC versus Dose – Day 13 (Repeat-Dose Study)**

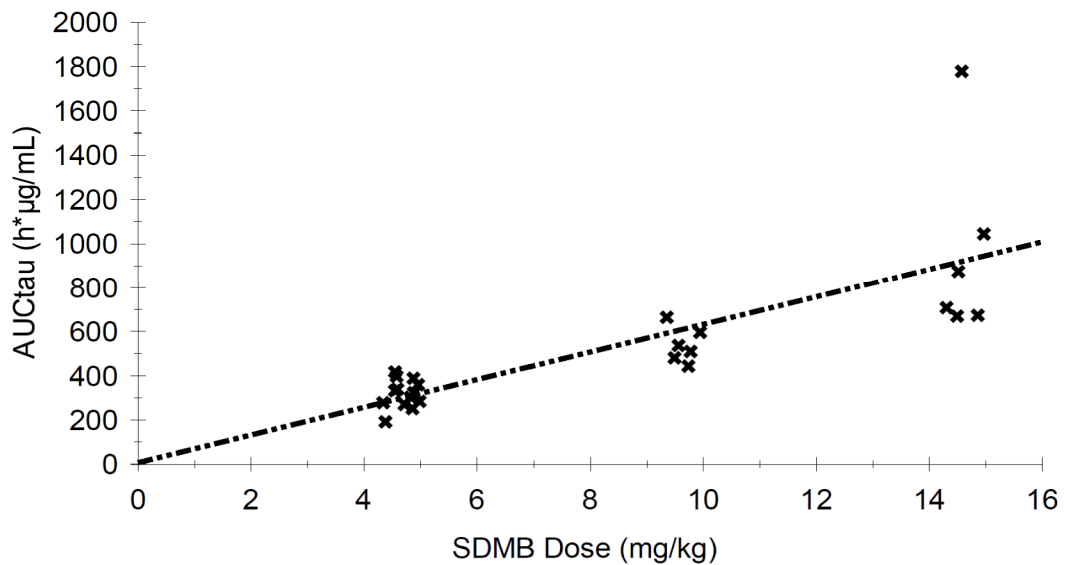

Supplemental Figure 2a:  $C_{max}$  versus Dose – Day 0 (Repeat-Dose Study)

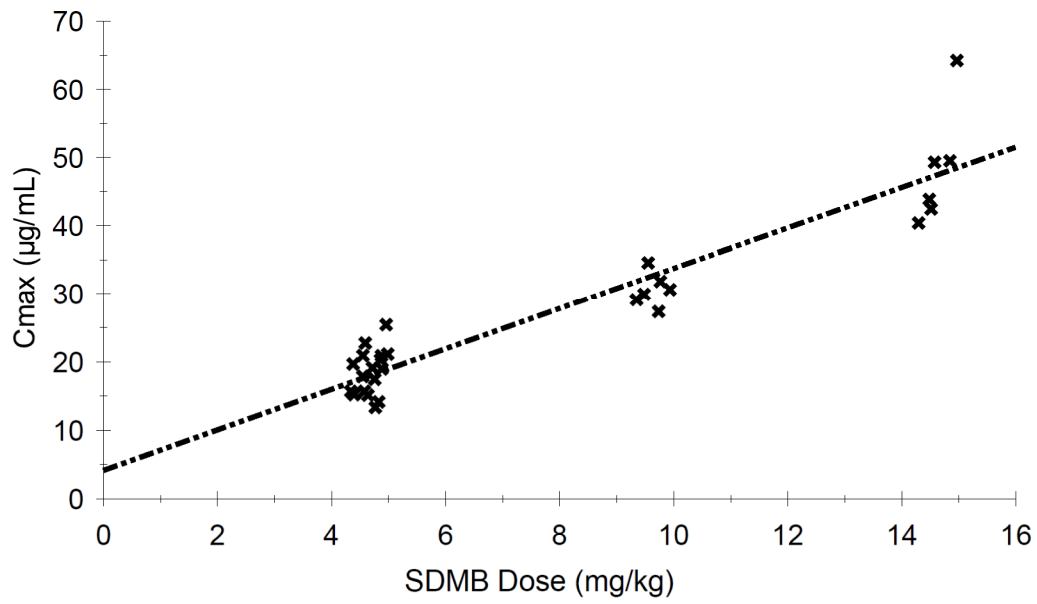

Supplemental Figure 2b:  $C_{max}$  versus Dose – Day 13 (Repeat-Dose Study)

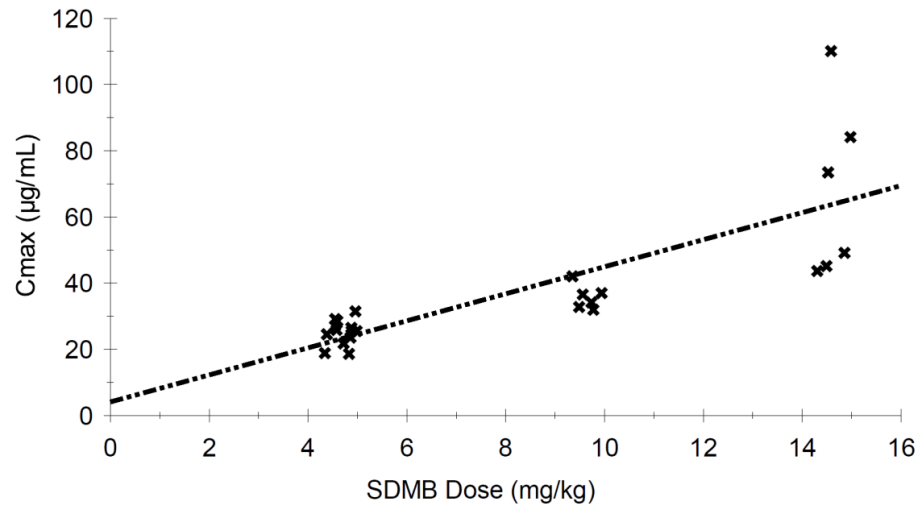

Supplement: NIHMS535899-supplement-supplement_1.pdf [file NIHMS535899-supplement-supplement_1.pdf]
